# Supplementary figures and images for: Tratment With Folic Acid Increases Paraoxonase 1 Activity Thereby Improving Chronic Kidney Disease
Source: Preprints.org preprint supplement (doi:10.20944/preprints202003.0472.v1), 2020-03-31

Figure1. CONSORT Flow Diagram

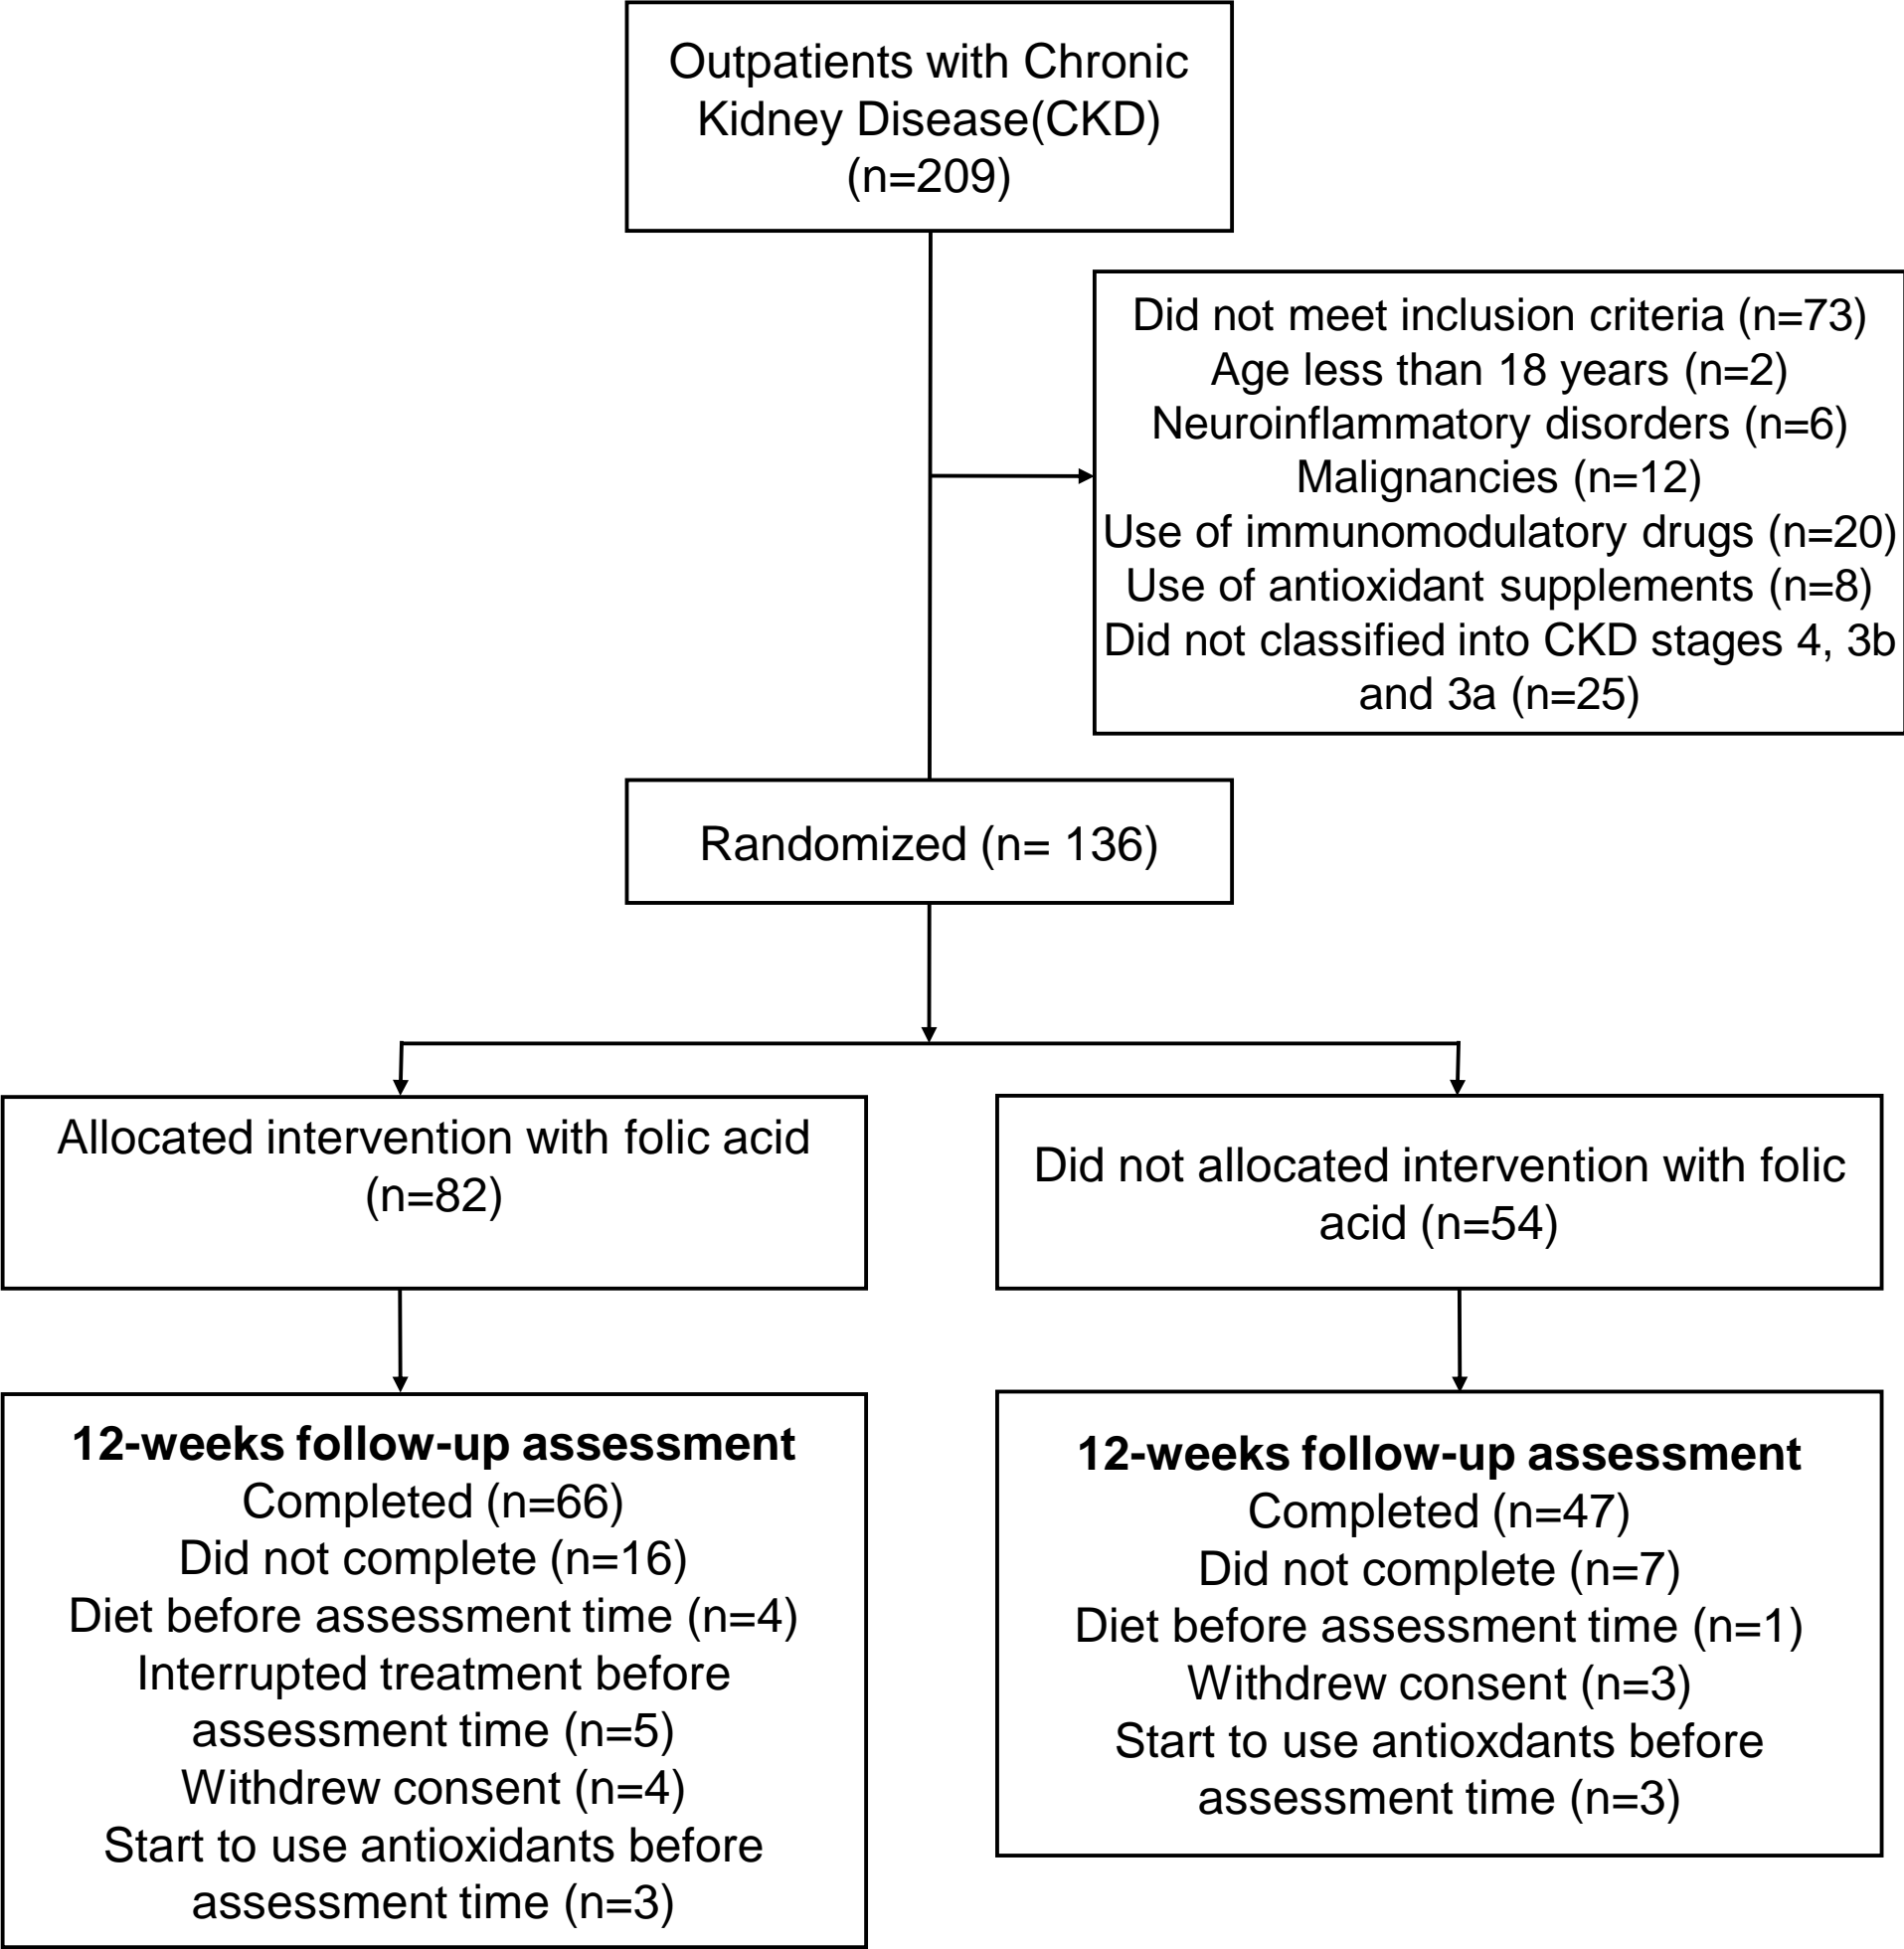

Supplement: Supplementary file 1 [file supplementary]
